# Supplementary material for: Characterization of Skeletal Muscle Biopsy and Derived Myoblasts in a Patient Carrying Arg14del Mutation in Phospholamban Gene
Source: MDPI journal article supplement (doi:10.3390/cells12101405), 2023-05-17
Supplement: s1 [file s1]

## Supplementary Information

Figure S1 Supplementary

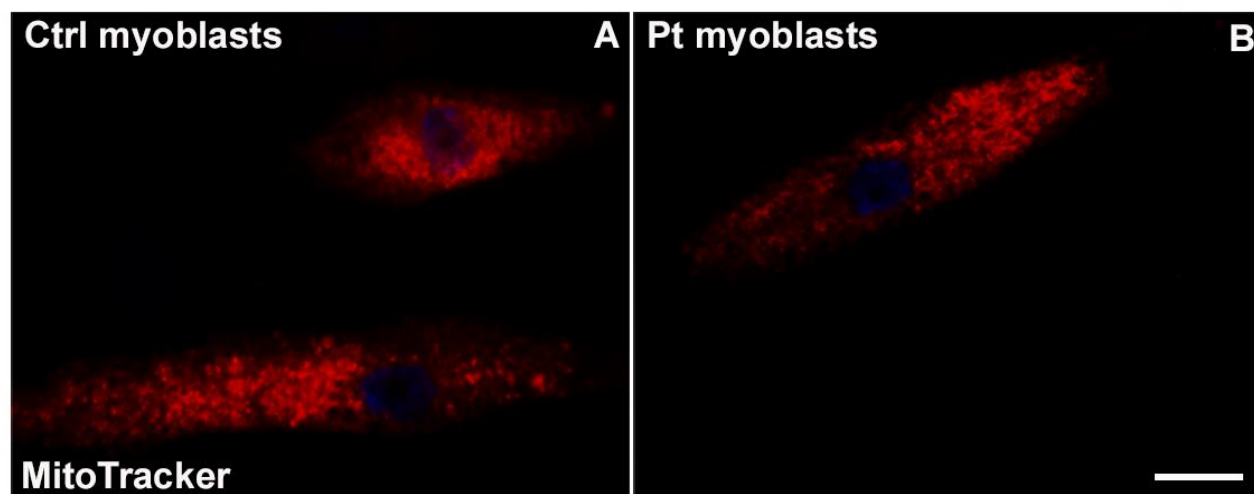

**Figure S1:** MitoTracker incubation showed a similar mitochondrial network in both control (A) and patient (B) myoblasts. Nuclei were counterstained with DAPI. Scale bar 50  $\mu\text{m}$ .

**Figure S2 Supplementary**

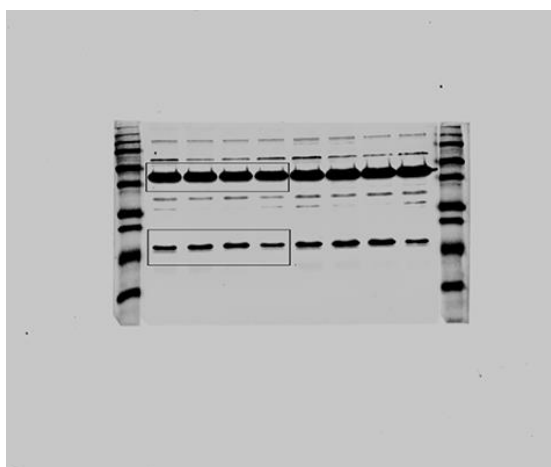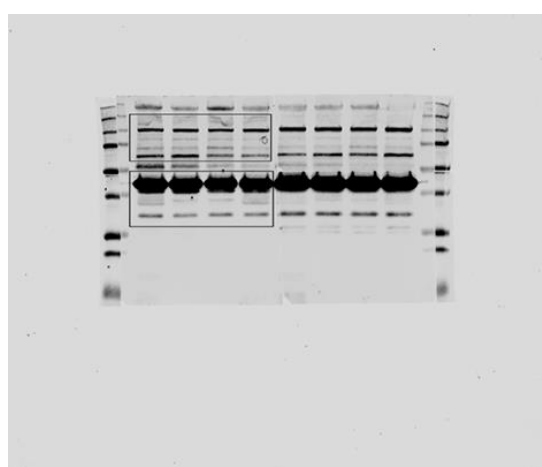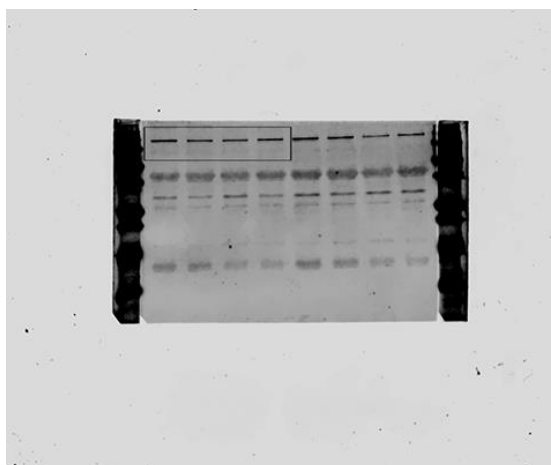

**Figure S2:** original uncropped Western Blot images.
